# Supplementary material for: Transformation of the strengthening and toughening modes of a poly(urethane) elastomer with hard segments of Ti3C2 MXene and its excellent triboelectric performance
Source: Royal Society of Chemistry journal article supplement (doi:10.1039/d4ta03575e), 2024-01-01
Supplement: d4ta03575e1.pdf [file d4ta03575e1.pdf]

1 **Transformation of the strengthening and toughening modes of**  
2 **Poly(urethane) elastomer with hard segments embracing  $Ti_3C_2$**   
3 **MXene and its excellent triboelectric performance**

4 Chuanqiang Sun, Baogang Yuan, Zhe Han, Dezhen Yang, Jinchuan Chen, Huajie Xu\*,  
5 Chuntai Liu, Changyu Shen

6 *State Key Laboratory of Structural Analysis, Optimization and CAE Software for Industrial*  
7 *Equipment, National Engineering Research Center for Advanced Polymer Processing*  
8 *Technology, The Key Laboratory of Advanced Materials Processing & Mold of Ministry of*  
9 *Education, Zhengzhou University, Zhengzhou, Henan 450002, China.*

10 **\*Corresponding author:** Huajie Xu.

11 E-mail address: xuhuajie@zzu.edu.cn, xhj1106@gmail.com (H. Xu).

12

13

14

15

## 16 1. Synthesis and characterization

### 17 1.1 Preparation of Ti<sub>3</sub>C<sub>2</sub> MXene and determination of its -OH group content

18 The preparation of Ti<sub>3</sub>C<sub>2</sub> MXene and the determination of its -OH group content is  
19 similar to Magenau method.<sup>1</sup> First, 2 g of LiF was dissolved in 40 mL of 9 M HCl in a  
20 Teflon beaker and stirred for 30 min. Then, 2 g of Ti<sub>3</sub>AlC<sub>2</sub> powder was slowly added into  
21 the LiF/HCl acid solution and stirred at 35 °C for 24 h. Next, the resultant mixture was  
22 washed with deionized (DI) water continuously by centrifuging at 3500 rpm until the pH of  
23 the mixture became approximately 6. The precipitation was dispersed in anhydrous ethanol  
24 for 1 h under ultrasound in an ice water bath, and the precipitation obtained by  
25 centrifugation of the prepared solution was added to deionized water. MXene solution was  
26 obtained after centrifugation at 3500 rpm for 10 min, and MXene nanosheets were obtained  
27 after freeze-drying. In order to determine its hydroxyl group content, Ti<sub>3</sub>C<sub>2</sub> MXene was  
28 modified by C<sub>12</sub>H<sub>25</sub>-NCO and the content of -OH on the surface of Ti<sub>3</sub>C<sub>2</sub> MXene was  
29 determined by thermogravimetric analysis. The results show that the content of -OH on the  
30 surface of Ti<sub>3</sub>C<sub>2</sub> MXene is about 1/130 mol/g.

31 Typically, the molar mass of the Ti<sub>3</sub>C<sub>2</sub>T<sub>z</sub> repeating unit ( $M_{Ti_3C_2T_z}$ ) was calculated by  
32 assuming  $z = 2$ ,<sup>2</sup> and surface composition F/O/OH = 0.25/0.5/0.25.<sup>3,4</sup> Using the molar mass  
33 of C<sub>12</sub>H<sub>25</sub>-NCO ( $M_{C_{12}H_{25}-NCO}$ ) and the mass fraction ( $X_{final}$ ) of Ti<sub>3</sub>C<sub>2</sub>T<sub>z</sub> in C<sub>12</sub>H<sub>25</sub>-Ti<sub>3</sub>C<sub>2</sub>T<sub>z</sub>  
34 obtained by thermogravimetric analysis, this ratio can be estimated using the following  
35 relationship:

$$36 \quad [C_{12}H_{25} - NCO]/[Ti_3C_2T_z] = \left( \frac{1 - X_{final}}{M_{C_{12}H_{25} - NCO}} \right) / \left( \frac{X_{final}}{M_{Ti_3C_2T_z}} \right) \quad (1)$$

37 Equation 1 can be modified to calculate the ratio of grafted C<sub>12</sub>H<sub>25</sub>-NCO chains to the  
 38 number of available surface functional groups (T<sub>reactive</sub>) by including z and X<sub>reactive</sub> explicitly:

$$39 \quad [C_{12}H_{25} - NCO]/[Ti_3C_2T_z] = \left(\frac{1 - X_{final}}{M_{C_{12}H_{25} - NCO}}\right) / \left(\frac{X_{final}}{M_{Ti_3C_2T_z}} \times z \times X_{reactive}\right) \quad (2)$$

40 Where X<sub>reactive</sub> refers to the concentration of reactive surface groups (-OH and O-) on  
 41 Ti<sub>3</sub>C<sub>2</sub>T<sub>z</sub> relative to the total concentration of surface groups. If X<sub>final</sub> is 0.383 and X<sub>reactive</sub> is  
 42 0.75, then

$$43 \quad [C_{12}H_{25} - NCO]/[Ti_3C_2T_z] = \left(\frac{1 - 0.383}{211.35g/mol}\right) / \left(\frac{0.383}{201.65g/mol}\right) = 1.54$$

$$44 \quad [C_{12}H_{25} - NCO]/[T_{reactive}] = \left(\frac{1 - 0.383}{211.35g/mol}\right) / \left(\frac{0.383}{201.65} \times 2 \times 0.75\right) = 1.02$$

## 45 1.2 Materials characterization

46 The morphology of Ti<sub>3</sub>C<sub>2</sub> were observed by an atomic force microscope (AFM +  
 47 Nano IR Bruker). X-ray diffraction (XRD) patterns were analyzed using a DX-2700BH X-  
 48 ray diffractometer with Cu Ka radiation (k=1.5405 Å) within the scope of 5-35°.  
 49 Attenuated total reflectance-Fourier transform infrared (ATR-FTIR) spectrum were  
 50 measured by a Nicolet 6700 (Thermo, USA). All materials were scanned from 4000 to 500  
 51 cm<sup>-1</sup> with a resolution of 4 cm<sup>-1</sup> and a scanning time of 64. Differential scanning  
 52 calorimetry (DSC) experiments were conducted using a TA Instruments Q2000 under the  
 53 nitrogen atmosphere. The samples were heated from -70 °C to 150 °C with a rate of 10  
 54 °C/min, and held isothermally for 5 minutes to eliminate any thermal history. The sample  
 55 was then cooled down to -70 °C at a rate of 10 °C/min and held isothermally for 2 minutes,  
 56 followed by heating up to 150 °C at a rate of 10 °C/min. All data were collected during the

57 second heating process. Dynamic mechanical analysis (DMA) experiments of samples with  
58 approximate sizes of 10 mm × 5 mm × 0.5 mm were conducted using a TA Q800  
59 Instrument with a heating rate of 3 °C/min from 30 °C to 100 °C. Both 1 Hz and 10 Hz  
60 tensile frequencies were applied in a strain-controlled mode with a constant amplitude of  
61 0.1%. The surface potential was measured by the Oscilloscope (STO1102C, Micsig).

### 62 **1.3 Mechanical tests**

63 Mechanical tensile tests were performed using an electronic universal material testing  
64 machine (UTM2203, Shenzhen Suns Technology Stock Co., Ltd., China) with a 100 N load  
65 cell at room temperature. The samples were cut into 10 × 5 × 0.5 mm. The strain rate of 50  
66 mm/min was used for both the unidirectional stretching and loading-unloading cycles. At  
67 least three specimens were tested for each elastomer sample, and the average values with  
68 standard errors were calculated. The toughness was acquired by integrating the area under  
69 the stress-strain curves. The energy dissipation was calculated by integrating the area  
70 encompassed by the cyclic tensile curves. The damping capacity was defined as the ratio of  
71 the dissipated energy to the loading energy. For stress relaxation, the sample was rapidly  
72 stretched to a constant strain (100%), and the change in the stress over time was recorded.

### 73 **1.4 Crack tolerance and Self-healing tests**

74 The fracture energy was conducted using a tensile test on the PUSS<sub>2</sub>-MX<sub>0.5</sub> elastomer  
75 sheets (10.0 mm in length, 5.0 mm in width, and 0.5 mm in thickness) with and without a  
76 single edged notch at a strain rate of 3 mm·min<sup>-1</sup>. The fracture toughness ( $G_C$ ) was  
77 calculated by the following equation:<sup>5</sup>

$$G_c = \frac{6Wc}{\sqrt{\lambda_c}} \quad (3)$$

78  
79 Where  $\lambda_c$  is the strain at break of the notched sample,  $c$  is the length of the notch, and  
80  $W$  is the energy calculated by the integration of the stress versus strain of unnotched  
81 samples.

82 For self-healing tests, the specimens were cut in half and then the cut surfaces were  
83 placed in contact immediately. Then, the samples were placed at 60 °C for healing. The  
84 self-healing efficiency was defined as follows:<sup>6</sup>

$$\eta = \frac{\sigma_{healed}}{\sigma_{original}} \times 100\% \quad (4)$$

86 Where  $\eta$  is the self-healing efficiency,  $\sigma_{original}$  is the tensile stress of the original  
87 sample, and  $\sigma_{healed}$  is the tensile stress of the healed sample.

88 Besides, scratching recovery tests were also performed by scratching neat films with a  
89 blade to evaluate self-healing ability. The scratch healing process was observed using an  
90 optical microscope with a heating table (OLYMPUS BX53M, Japan).

### 91 **1.5 Assembly of PUS<sub>2</sub>-MX<sub>0.5</sub>/PTFE-based TENG:**

92 The TENG was assembled in a vertical contact-separation mode. PUS<sub>2</sub>-MX<sub>0.5</sub> was  
93 used as the positive friction material for the triboelectric device, while PTFE was used as  
94 the negative friction material. The PUS<sub>2</sub>-MX<sub>0.5</sub> and commercial PTFE films were cut into  
95 square shapes with dimensions of 2.0 × 2.0 cm<sup>2</sup>, and two copper tapes were attached to  
96 their covered sides as electrodes. They were then individually fixed onto polymethyl

97 methacrylate (PMMA) plates, with four springs used to keep them separated. The PUSS<sub>2</sub>-  
98 MX<sub>0.5</sub> layer and the PTFE layer were assembled face-to-face to ensure full contact, with a  
99 gap of approximately 5 mm maintained by the springs.

## 100 **1.6 Dielectric properties of elastomer**

101 The Dielectric properties was tested by Precision LCR tester (E4980A, Agilent).

$$102 \quad \varepsilon = C \times \frac{d}{\varepsilon_0 \times S} \quad (5)$$

103 Where  $C$  is a capacitor that uses the material as a dielectric capacitor,  $\varepsilon_0$  is the  
104 dielectric constant of vacuum ( $8.85 \times 10^{-12}$  F/m),  $d$  is the sample thickness,  $S$  is the sample  
105 area ( $S = \pi \times 12.5^2 \times 10^{-6}$  m<sup>2</sup>).

106 Calculation details: All DFT calculations are performed in ORCA software, using  
107 B3LYP functional calculations, DFT-D3 (BJ) for dispersion correction, and ma-def2-TZVP  
108 base set for dipole moment calculations.<sup>7,8</sup>

## 109 **1.7 Output performance of TENG**

110 The output performance of TENG was recorded by the Oscilloscope (STO1102C,  
111 Micsig) and electrochemical workstation (CHI660E, China) at room temperature and 25%  
112 RH humidity. The conductive tape and copper wires were contacted with friction layers for  
113 electrical signal output. To evaluate the output performance of TENG, the samples ( $20 \times 20$   
114  $\times 0.5$  mm<sup>3</sup>) were prepared to assemble TENG for testing. The power density is determined  
115 by the following equation:

$$P = \frac{UI}{A}$$

(6)

116

117       Where  $U$ ,  $I$  and  $A$  represent the output voltage, output current, and contact area,  
118 respectively.

119

120 2. Figures and Tables

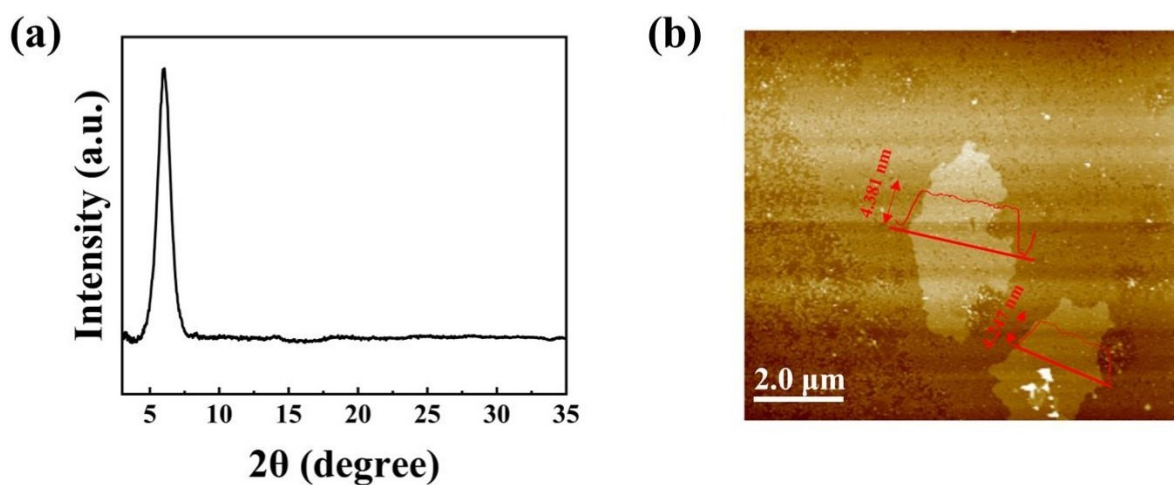

121

122 **Fig. S1.** (a) Wide angle X-ray diffraction pattern of  $\text{Ti}_3\text{C}_2$  MXene and (b) AFM image of

123

$\text{Ti}_3\text{C}_2$  nanosheets.

124

125

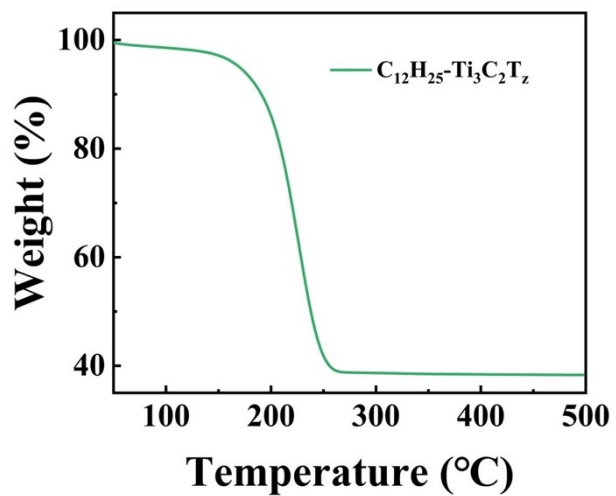

126

127

**Fig. S2.** TGA curve of  $\text{C}_{12}\text{H}_{25}\text{-Ti}_3\text{C}_2\text{T}_z$ .



**Table. S1.** The ratio of reactants for different elastomers.

| Samples                                | PCL (g) | IPDI (g) | MXene (mg) | 4AD (g) | $\frac{n(-OH+NH_2)}{n(-NCO)}$ |
|----------------------------------------|---------|----------|------------|---------|-------------------------------|
| PU-MX <sub>0</sub>                     | 10.00   | 1.11     | /          | /       | 1                             |
| PU-MX <sub>0.5</sub> C                 | 10.00   | 1.16     | 55.80      | /       | 1                             |
| PU-MX <sub>1</sub> C                   | 10.00   | 1.21     | 112.00     | /       | 1                             |
| PU-MX <sub>5</sub> C                   | 10.00   | 1.61     | 580.30     | /       | 1                             |
| PU-MX <sub>0.5</sub> H                 | 10.00   | 1.11     | 55.60      | /       | 1                             |
| PU-MX <sub>1</sub> H                   | 10.00   | 1.11     | 111.10     | /       | 1                             |
| PU-MX <sub>5</sub> H                   | 10.00   | 1.11     | 555.50     | /       | 1                             |
| PUSS <sub>1</sub> -MX <sub>0.5</sub>   | 10.00   | 2.28     | 67.60      | 1.24    | 1                             |
| PUSS <sub>1.5</sub> -MX <sub>0.5</sub> | 10.00   | 2.84     | 73.50      | 1.86    | 1                             |
| PUSS <sub>2</sub> -MX <sub>0.5</sub>   | 10.00   | 3.40     | 79.40      | 2.48    | 1                             |
| PUSS <sub>2.5</sub> -MX <sub>0.5</sub> | 10.00   | 3.96     | 85.30      | 3.10    | 1                             |

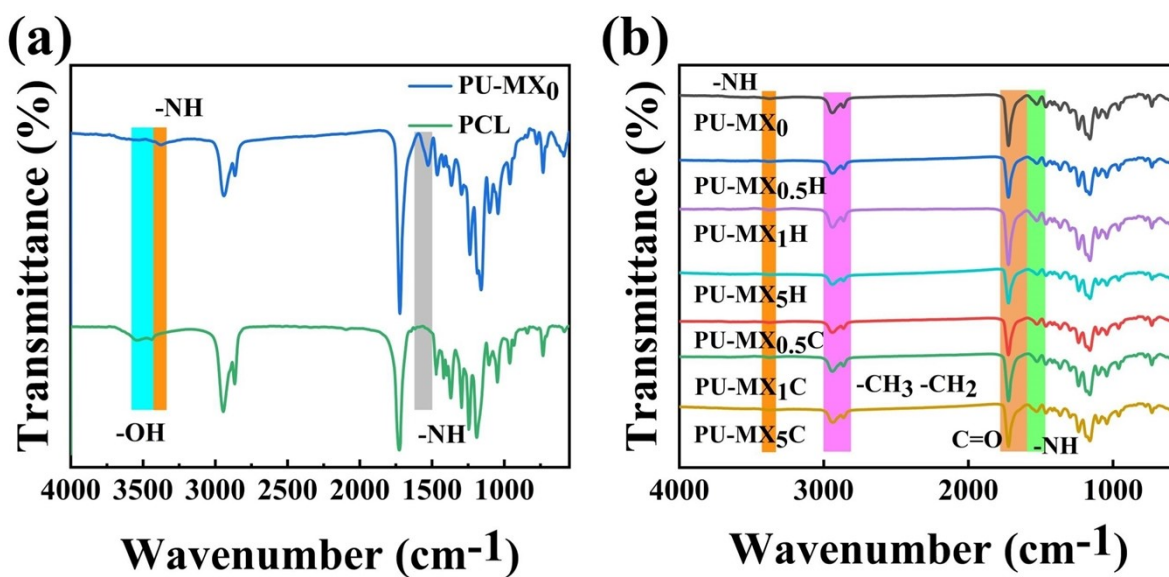**Fig. S3.** FT-IR spectra of (a) PU-MX<sub>0</sub> and PCL and (b) PU-MX.

132

**Table. S2.** Physical properties of seven elastomers.

| Sample                 | $T_g$ (°C) | $T_c$ (°C) | $\Delta H_c$ (J/g) | $T_m$ (°C) | $\Delta H_m$ (J/g) | $\Delta H$ ( $\Delta H_m - \Delta H_c$ ) |
|------------------------|------------|------------|--------------------|------------|--------------------|------------------------------------------|
| PU-MX <sub>0</sub>     | -55.40     | 0.66       | 28.21              | 34.92      | 34.91              | 6.70                                     |
| PU-MX <sub>0.5</sub> C | -55.28     | -11.17     | 27.38              | 32.25      | 34.98              | 7.60                                     |
| PU-MX <sub>1</sub> C   | -55.40     | 7.96       | 10.21              | 33.05      | 13.58              | 3.37                                     |
| PU-MX <sub>5</sub> C   | -55.27     | 9.99       | 5.54               | 32.15      | 7.80               | 2.26                                     |
| PU-MX <sub>0.5</sub> H | -56.25     | -12.19     | 24.39              | 35.93      | 42.10              | 17.71                                    |
| PU-MX <sub>1</sub> H   | -55.26     | -12.07     | 25.75              | 33.51      | 39.29              | 13.54                                    |
| PU-MX <sub>5</sub> H   | -55.52     | -3.72      | 28.21              | 33.51      | 33.11              | 4.90                                     |

133

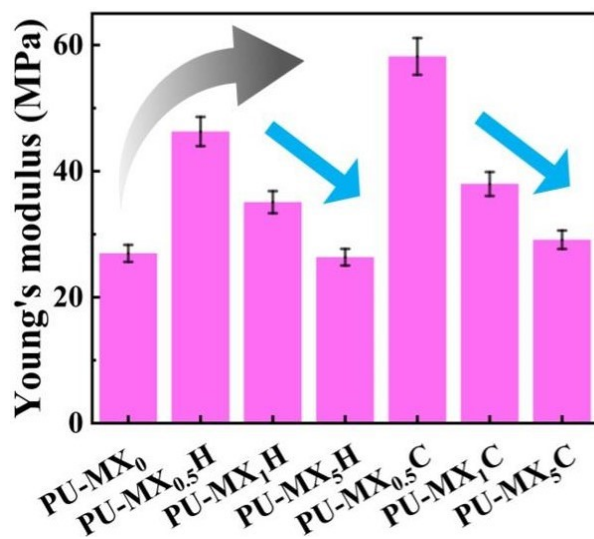

134

135

**Fig. S4.** Young's modulus of PU-MX<sub>0</sub>, PU-MXH and PU-MXC elastomers.

136

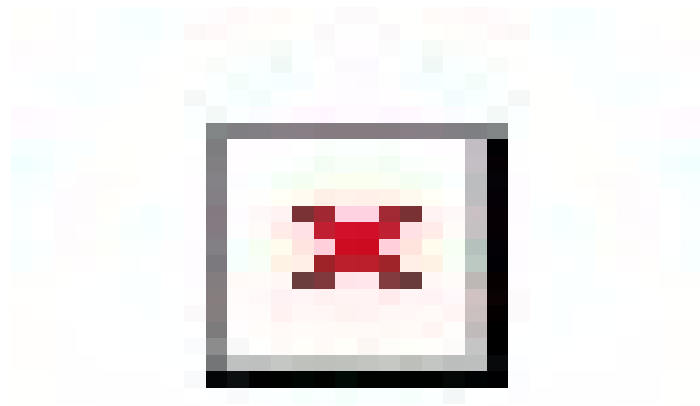

137

138 **Fig. S5.** Wide angle X-ray diffraction patterns of PU-MX<sub>0</sub>, PU-MXH and PU-MXC.

139

140

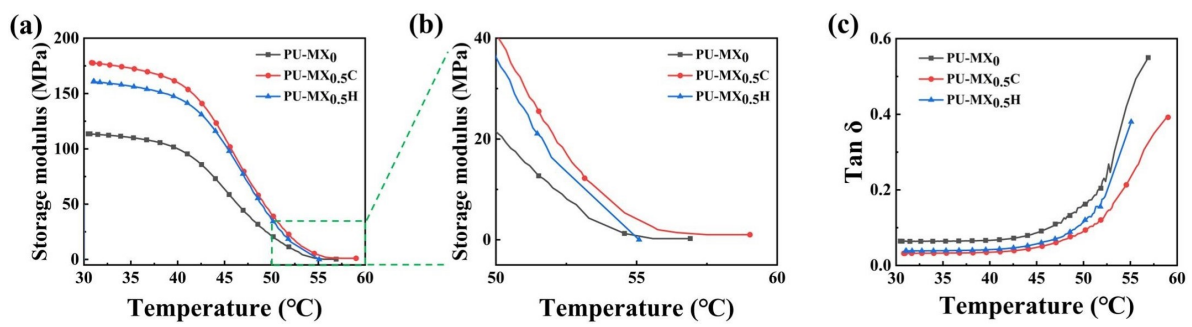

141

142 **Fig. S6.** (a) Storage modulus and (b) partial enlargement, (c) Tan  $\delta$  of PU elastomers.

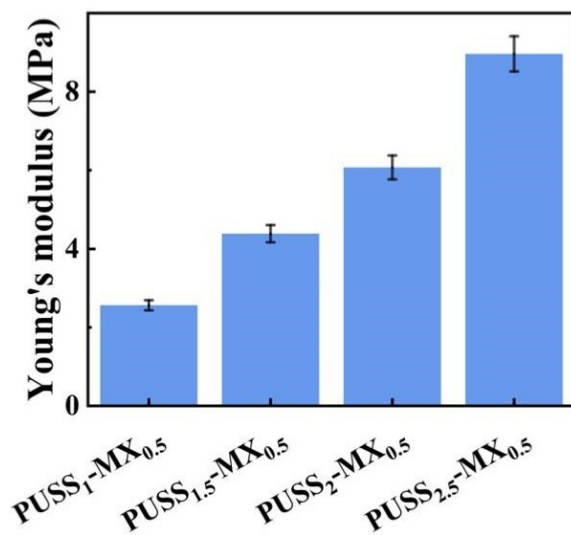

143

144

**Fig. S7.** Young's modulus of PUSS-MX elastomers.

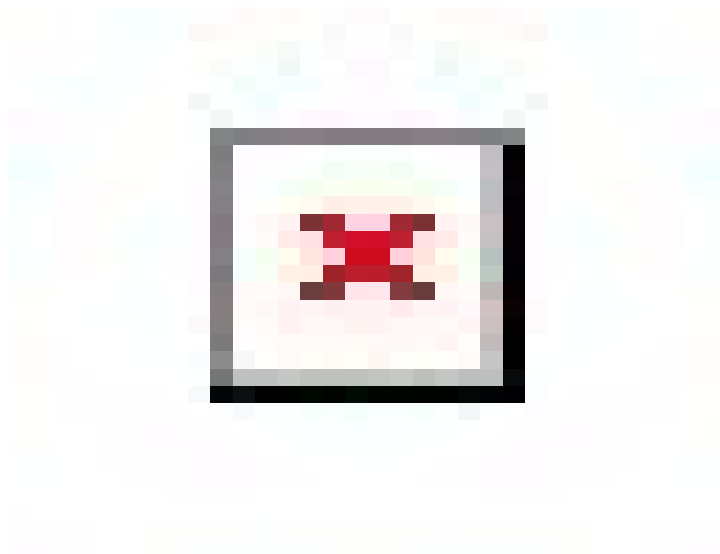

145

146

**Fig. S8.** DSC curves of PUSS-MX.

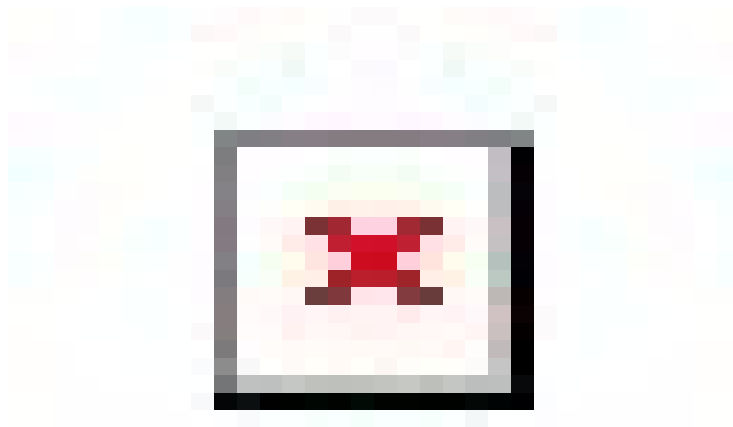

147

148 **Fig. S9.** FT-IR spectra of PUSS-MX in the wavenumber range of 4000-600  $\text{cm}^{-1}$ .

149

150

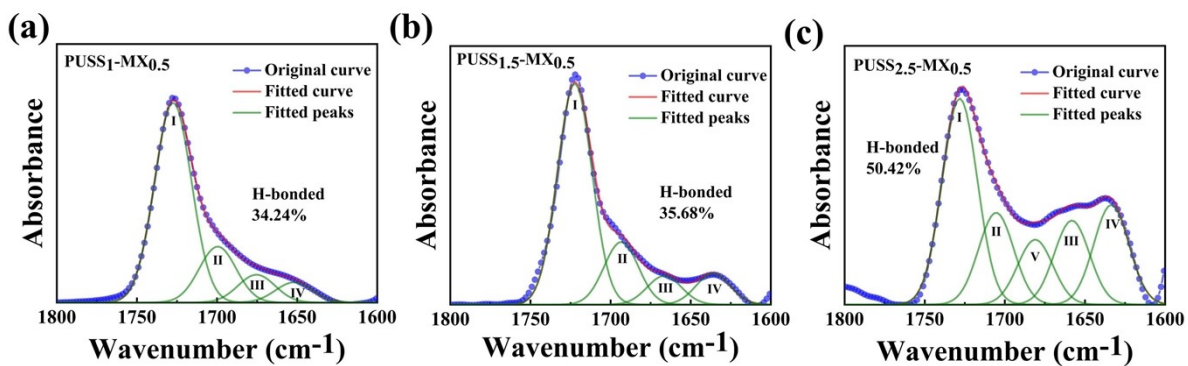

151

152 **Fig. S10.** Deconvolution of C=O stretching region in FT-IR spectra of three elastomers.

153 **Table. S3.** Summary of the assignment of the deconvoluted subpeaks in the FT-IR C=O

154 absorption bands for four elastomers.

| Assignment                  |                          | Wavenumber (cm <sup>-1</sup> ) |                     |                    |                     | Area (%)           |                     |                    |                     |
|-----------------------------|--------------------------|--------------------------------|---------------------|--------------------|---------------------|--------------------|---------------------|--------------------|---------------------|
|                             |                          | PUSS <sub>1</sub>              | PUSS <sub>1.5</sub> | PUSS <sub>2</sub>  | PUSS <sub>2.5</sub> | PUSS <sub>1</sub>  | PUSS <sub>1.5</sub> | PUSS <sub>2</sub>  | PUSS <sub>2.5</sub> |
|                             |                          | -MX <sub>0.5</sub>             | -MX <sub>0.5</sub>  | -MX <sub>0.5</sub> | -MX <sub>0.5</sub>  | -MX <sub>0.5</sub> | -MX <sub>0.5</sub>  | -MX <sub>0.5</sub> | -MX <sub>0.5</sub>  |
| ν(C=O)<br>urethane<br>amide | Free                     | 1727                           | 1722                | 1725               | 1728                | 65.76              | 64.32               | 53.64              | 37.69               |
|                             | H-bonded<br>(Ordered)    | 1699                           | 1693                | 1700               | 1705                | 18.42              | 18.24               | 20.55              | 16.81               |
| ν(C=O)<br>urea<br>amide     | Free                     | -                              | -                   | -                  | 1680                | -                  | -                   | -                  | 11.89               |
|                             | H-bonded<br>(Disordered) | 1675                           | 1666                | 1668               | 1658                | 9.16               | 8.37                | 8.97               | 15.38               |
|                             | H-bonded<br>(Ordered)    | 1651                           | 1635                | 1631               | 1633                | 6.66               | 9.07                | 16.84              | 18.23               |
| Total degree of H-bonded    |                          |                                |                     |                    |                     | 34.24              | 35.68               | 46.36              | 50.42               |

155

156

157 **Table S4.** Comparison of Tensile strength, Elongation, and Toughness of various self-  
 158 healing polymers.

| Self-healing motif           | Tensile strength<br>(MPa) | Elongation<br>(%) | Toughness<br>(MJ m <sup>-3</sup> ) | Ref              |
|------------------------------|---------------------------|-------------------|------------------------------------|------------------|
| Disulfides                   | 6.76                      | 923               | 26.9                               | 9                |
|                              | 4.3                       | 128               | 3.1                                | 10               |
|                              | 0.392                     | 202               | 0.5                                | 11               |
|                              | 0.23                      | 105               | 0.13                               | 12               |
|                              | 0.46                      | 932               | 1.87                               | 13               |
|                              | 6.3                       | 852               | 23.2                               | 14               |
| Hydrogen bonding             | 1.9                       | 780               | 10.0                               | 15               |
|                              | 1.7                       | 1735              | 14.9                               | 16               |
|                              | 1.9                       | 1508              | 17.6                               | 17               |
|                              | 3.4                       | 600               | 8                                  | 18               |
| Boronic ester                | 4.4                       | 58                | 1.4                                | 19               |
|                              | 2.1                       | 450               | 6.0                                | 20               |
| Van der Waals                | 4.4                       | 560               | 12.0                               | 21               |
| Ionic interactions           | 10.3                      | 366               | 29.0                               | 22               |
|                              | 5.2                       | 1667              | 40.1                               | 23               |
| Boroxine                     | 12.7                      | 184               | 17.5                               | 24               |
| Boronic ester and<br>H-bonds | 1.64                      | 777               | -                                  | 25               |
| Disulfides and H-bonds       | 0.81                      | 3100              | 13                                 | 26               |
|                              | 9.3                       | 637               | -                                  | 27               |
|                              | 14.08                     | 974.84            | 64.6                               | 28               |
|                              | <b>22.1</b>               | <b>2281.4</b>     | <b>334.3</b>                       | <b>This work</b> |

159

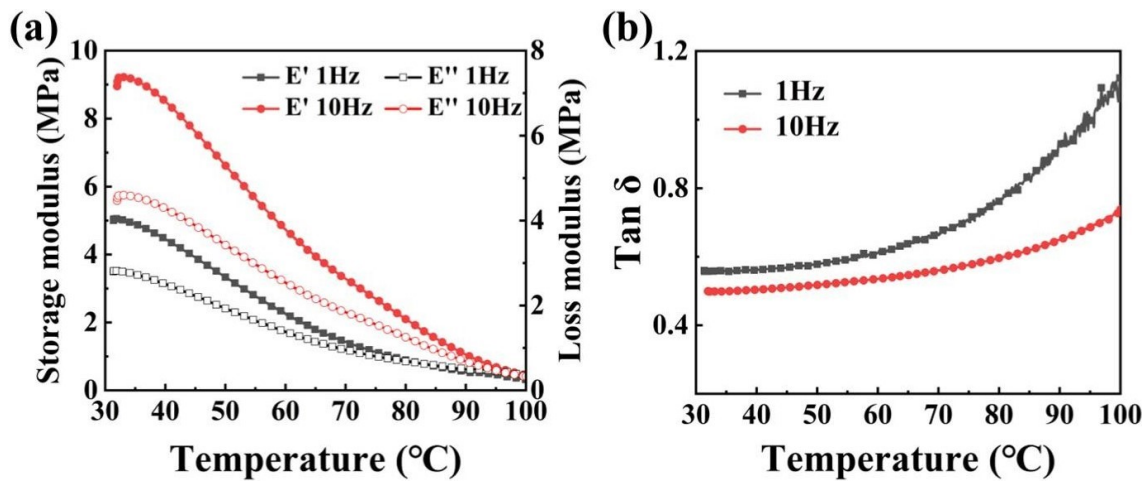

160

161 Fig. S11. Dynamic mechanical tests of PUSS<sub>2</sub>-MX<sub>0.5</sub> elastomer at 1 Hz and 10 Hz.

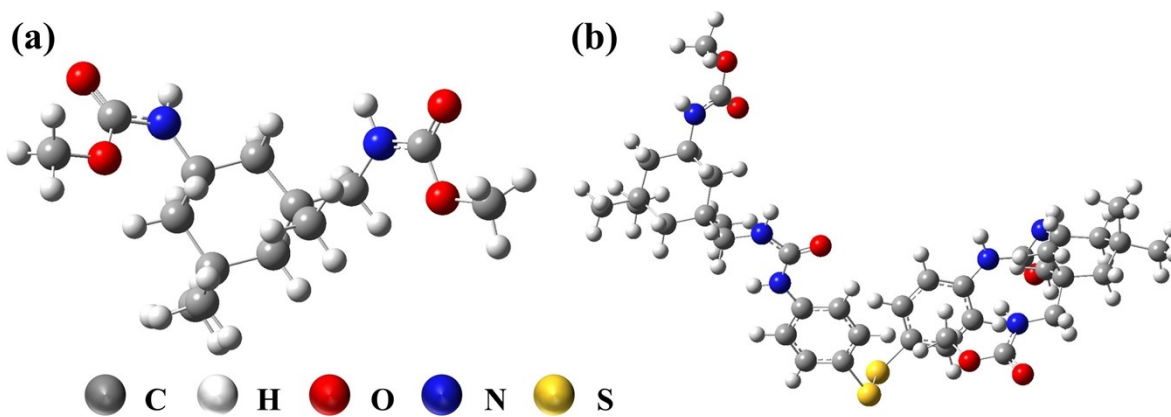

162

163 Fig. S12. Structure optimization models of (a) urethane group and (b) urea group.

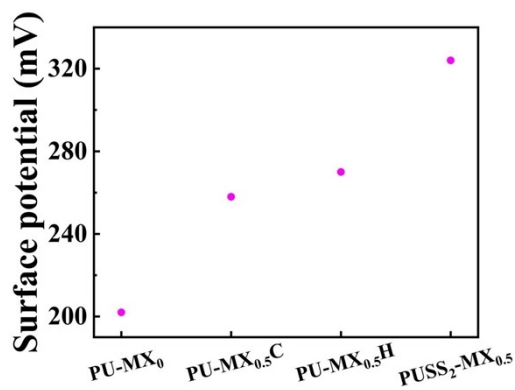

164

165

Fig. S13. Surface potential measurement of elastomers.



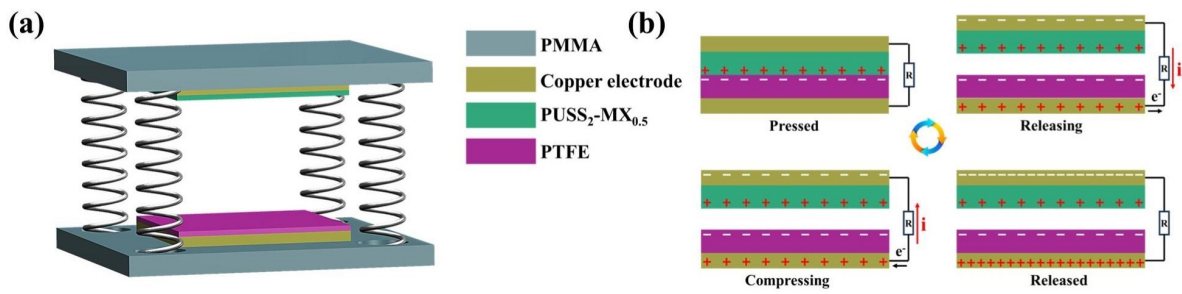

166

167 **Fig. S14.** Illustration of (a) assembly and (b) working principle of the PUSS<sub>2</sub>-MX<sub>0.5</sub>-TENG.

168

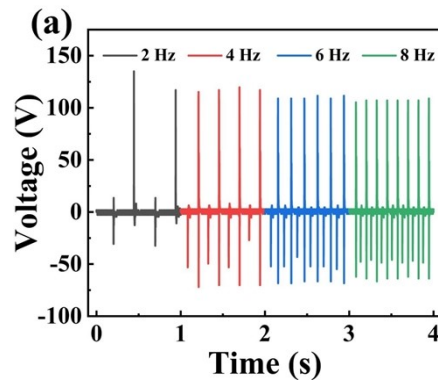

169

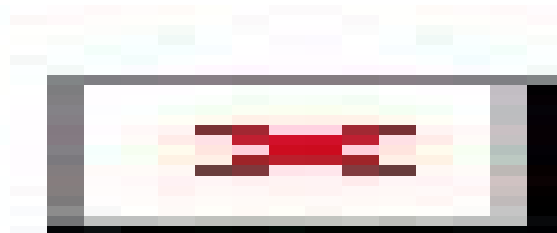

170

171 **Fig. S15.** (a) Output voltage of PUSS<sub>2</sub>-MX<sub>0.5</sub> TENG at the different testing frequency, (b)

172 Output voltage of the TENG in the continuous running more than 6000 cycles.

173

174

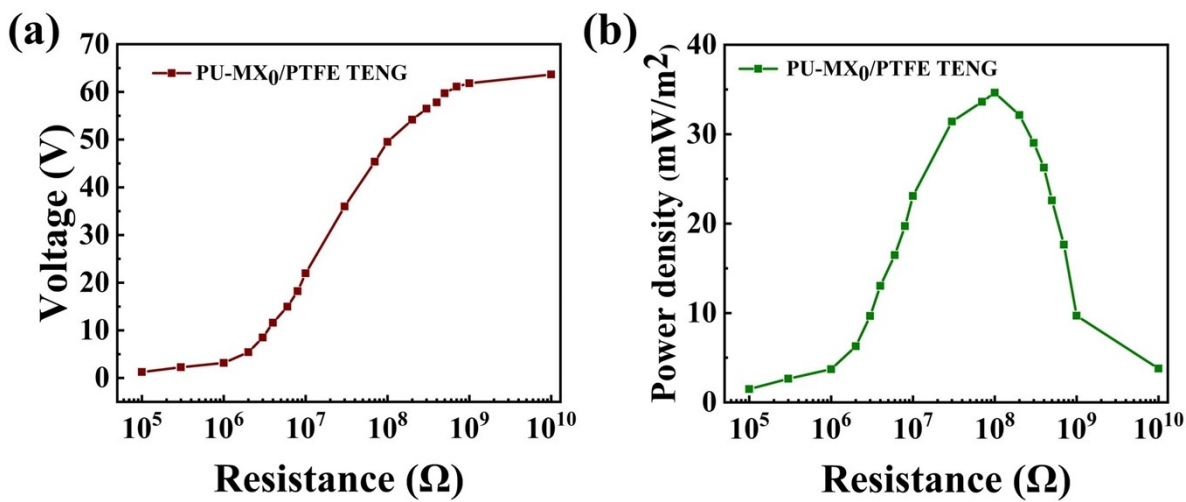

175

176 **Fig. S16.** (a) Voltage and (b) power density of PU-MX<sub>0</sub>/PTFE TENG connected to

177

different load resistance.

178

179

180

181

182

183

184

185

186

187 **Table S5.** Comparison of Open circuit voltage and Power density of various TENGs.

| Component                                     | Open circuit voltage (V) | Open circuit voltage per unit area (V/cm <sup>2</sup> ) | Power Density(mW/m <sup>2</sup> ) | Ref              |
|-----------------------------------------------|--------------------------|---------------------------------------------------------|-----------------------------------|------------------|
| PVDF/PTFE                                     | 25                       | 6.25                                                    | 2.75                              | 29               |
| H-DLC/PTFE                                    | 32                       | 2.53                                                    | 57                                | 30               |
| woven-TENG/PTFE                               | 62.9                     | 0.98                                                    | 5.43                              | 31               |
| (BMOF/FCF)/(PTFE/Al)                          | 47                       | 20.89                                                   | 1.1                               | 32               |
| (MXene/PLA)/PTFE                              | 88                       | 22                                                      | 35.4                              | 33               |
| ZnO-PVDF/Au/PTFE                              | 97                       | 53.88                                                   | 245                               | 34               |
| <b>PUSS<sub>2</sub>-MX<sub>0.5</sub>/PTFE</b> | <b>119</b>               | <b>29.75</b>                                            | <b>76.2</b>                       | <b>This work</b> |

188

189 **Video S1.** Green light-emitting diodes (LEDs) powered by the TENG.

190 **References**

- 191 1. R. M. McDaniel, M. S. Carey, O. R. Wilson, M. W. Barsoum and A. J. D. Magenau,  
 192 Chemistry of Materials, 2021, 33, 1648-1656.
- 193 2. P. O. Å. Persson and J. Rosen, Current Opinion in Solid State and Materials Science,  
 194 2019, 23, 100774.
- 195 3. R. Ibragimova, M. J. Puska and H.-P. Komsa, ACS Nano, 2019, 13, 9171-9181.
- 196 4. T. Hu, M. Hu, B. Gao, W. Li and X. Wang, The Journal of Physical Chemistry C,  
 197 2018, 122, 18501-18509.
- 198 5. H. W. Greensmith, Journal of Applied Polymer Science, 1963, 7, 993-1002.

- 199 6. S. Park, G. Thangavel, K. Parida, S. Li and P. S. Lee, *Advanced Materials*, 2019, 31,  
200 1805536.
- 201 7. F. Neese, *WIREs Computational Molecular Science*, 2018, 8, e1327.
- 202 8. S. Grimme, S. Ehrlich and L. Goerigk, *Journal of Computational Chemistry*, 2011, 32,  
203 1456-1465.
- 204 9. S. M. Kim, H. Jeon, S. H. Shin, S. A. Park, J. Jegal, S. Y. Hwang, D. X. Oh and J.  
205 Park, *Advanced Materials*, 2018, 30, 1705145.
- 206 10. R. H. Aguirresarobe, L. Martin, M. J. Fernandez-Berridi and L. Irusta, *EXPRESS*  
207 *POLYMER LETTERS*, 2017, 11, 266-277.
- 208 11. Y. Amamoto, H. Otsuka, A. Takahara and K. Matyjaszewski, *Advanced Materials*,  
209 2012, 24, 3975-3980.
- 210 12. Z. Q. Lei, H. P. Xiang, Y. J. Yuan, M. Z. Rong and M. Q. Zhang, *CHEMISTRY OF*  
211 *MATERIALS*, 2014, 26, 2038-2046.
- 212 13. Y. Wang, X. K. Liu, S. H. Li, T. Q. Li, Y. Song, Z. D. Li, W. K. Zhang and J. Q. Sun,  
213 *ACS APPLIED MATERIALS & INTERFACES*, 2017, 9, 29120-29129.
- 214 14. Y. L. Chen, A. M. Kushner, G. A. Williams and Z. B. Guan, *NATURE CHEMISTRY*,  
215 2012, 4, 467-472.
- 216 15. J. H. Kang, D. Son, G. J. N. Wang, Y. X. Liu, J. Lopez, Y. Kim, J. Y. Oh, T.  
217 Katsumata, J. W. Mun, Y. Lee, L. H. Jin, J. B. H. Tok and Z. N. Bao, *ADVANCED*  
218 *MATERIALS*, 2018, 30.
- 219 16. Y. X. Pan, J. L. Hu, Z. Y. Yang and L. Tan, *ACS APPLIED POLYMER*  
220 *MATERIALS*, 2019, 1, 425-+.
- 221 17. P. Cordier, F. Tournilhac, C. Soulié-Ziakovic and L. Leibler, *NATURE*, 2008, 451,  
222 977-980.
- 223 18. Y. Yang, F. S. Du and Z. C. Li, *ACS APPLIED POLYMER MATERIALS*, 2020, 2,  
224 5630-5640.

- 225 19. J. J. Cash, T. Kubo, A. P. Bapat and B. S. Sumerlin, *Macromolecules*, 2015, 48, 2098-  
226 2106.
- 227 20. C. Kim, H. Ejima and N. Yoshie, *JOURNAL OF MATERIALS CHEMISTRY A*,  
228 2018, 6, 19643-19652.
- 229 21. A. Susa, R. K. Bose, A. M. Grande, S. van der Zwaag and S. J. Garcia, *ACS*  
230 *APPLIED MATERIALS & INTERFACES*, 2016, 8, 34068-34079.
- 231 22. J. Y. Zhang, M. M. Huo, M. Li, T. Q. Li, N. X. Li, J. C. Zhou and J. Jiang,  
232 *POLYMER*, 2018, 134, 35-43.
- 233 23. Y. Miwa, J. Kurachi, Y. Kohbara and S. Kutsumizu, *COMMUNICATIONS*  
234 *CHEMISTRY*, 2018, 1.
- 235 24. C. Y. Bao, Y. J. Jiang, H. Y. Zhang, X. Y. Lu and J. Q. Sun, *ADVANCED*  
236 *FUNCTIONAL MATERIALS*, 2018, 28.
- 237 25. J. H. Zhang, L. M. Cao and Y. K. Chen, *EUROPEAN POLYMER JOURNAL*, 2022,  
238 168.
- 239 26. A. Rekondo, R. Martin, A. R. de Luzuriaga, G. Cabañero, H. J. Grande and I.  
240 Odriozola, *MATERIALS HORIZONS*, 2014, 1, 237-240.
- 241 27. B. Cheng, X. Lu, J. H. Zhou, R. Qin and Y. L. Yang, *ACS SUSTAINABLE*  
242 *CHEMISTRY & ENGINEERING*, 2019, 7, 4443-4455.
- 243 28. Y. W. Xu, S. Zhou, Z. H. Wu, X. Y. Yang, N. Li, Z. H. Qin and T. F. Jiao,  
244 *CHEMICAL ENGINEERING JOURNAL*, 2023, 466.
- 245 29. J. Zhu, Y. Zhu and X. Wang, *Advanced Materials Interfaces*, 2018, 5, 1700750.
- 246 30. S. H. Ramaswamy, J. Shimizu, W. Chen, R. Kondo and J. Choi, *Nano Energy*, 2019,  
247 60, 875-885.
- 248 31. W. Paosangthong, M. Wagih, R. Torah and S. Beeby, *Nano Energy*, 2022, 92, 106739.
- 249 32. N. Jayababu and D. Kim, *Nano Energy*, 2021, 89, 106355.

250 33. Z. Du, G. Zhang, K. Chen, C. Zhou, X. Zhu, Y. Zhang, K. Chen, H.-Y. Mi, Y. Wang,  
251 C. Liu and C. Shen, ACS Appl. Mater. Interfaces, 2022, 14, 14607-14617.

252 34. H. H. Singh and N. Khare, Nano Energy, 2018, 51, 216-222.

253
